# Supplementary material for: Effect of N-acetyl-l-cysteine on Cell Phenotype and Autophagy in Pichia pastoris Expressing Human Serum Albumin and Porcine Follicle-Stimulating Hormone Fusion Protein
Source: MDPI journal article supplement (doi:10.3390/molecules28073041), 2023-03-29
Supplement: s1 [file s1]

Figure S1 Transmission electron microscopy (TEM) of the F strain treated with 5 mM NAC for 72 h. Nu: cell nucleus, Mito: mitochondria, Vac: Vacuole.

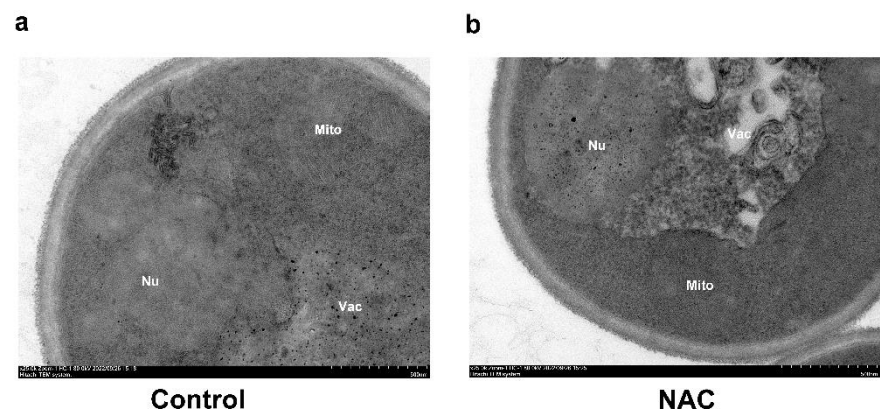

Figure S2: SDS-PAGE analysis of recombinant HSA-pFSH $\beta$  protein in the culture medium of FApe1 strain supplementing with or without NAC; +: represent the sample of culture medium supplementing with 5 mM NAC, otherwise marked -. Arrow 1 and 2 represent intact HSA-pFSH $\beta$  and truncated HSA.

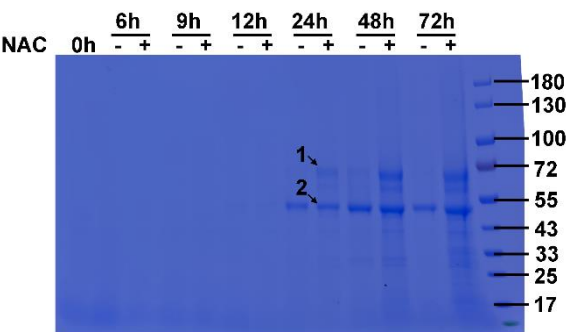

Figure S3: Analysis of HSA-pFSH $\beta$  yield in culture medium and fluorescence signal in cells. (a) SDS-PAGE analysis of recombinant HSA-pFSH $\beta$  protein in the culture medium of FTom20 strain supplementing with or without NAC; +: represent the sample of culture medium supplementing with 5 mM NAC, otherwise marked -.Arrow 1 and 2 represent intact HSA-pFSH $\beta$  and truncated HSA.(b) Total fluorescence intensity of FTom20 strain at different times of NAC treatment. The excitation and emission wavelengths are 485 nm, and 535 nm, respectively. p values were calculated using Student's t-test with  $p<0.05$  considered statistically significant (Marked with \*). Error bars represent means $\pm$ standard deviation (SD)( $n=3$ ).



**Table S1. Oligonucleotides used in this study.**

| Oligonucleotides | Sequence (5'-3')          |
|------------------|---------------------------|
| YDJ-F            | GCATACGAGGTTCTTTCCG       |
| YDJ-R            | TCTGTGGTCCTGTAGGTTGG      |
| ATG1-F           | TCTGTCGGTGCTGTCGTTT       |
| ATG1-R           | GTTTCGTCGCTACAAGGTTGA     |
| TRS23-F          | ACAAATCGGGTGGGCTAAT       |
| TRS23-R          | GTAAAGTGCCCGCAGTGAT       |
| GET3-F           | CGGTAGTGCTGGAGGAAAC       |
| GET3-R           | CTAAAGTGGATGGCAACTGTAA    |
| SNC2-F           | ACATCAACAAAAGTGGCACAAC    |
| SNC2-R           | TTAGCACCTCGTCTGAAACC      |
| VPS21-F          | TTGAGACCTCGGCAAAGAC       |
| VPS21-R          | TTGACAGGTTGATTCCGTAGA     |
| PEX14-F          | TAGGCTATCGGAGTCGTGTATC    |
| PEX14-R          | ACATTTTCGGACGGCTTGAT      |
| ARF1-F           | GTGACTTGGAGGATACTGGGTT    |
| ARF1-R           | ATGAGAATACGGACTTCTTTGG    |
| SAR1-F           | GTCACGAACAAGCCAGAAGA      |
| SAR1-R           | TACCCAAGACCAAAAACAGGA     |
| ATG9-F           | TCGGCAAAGTCTAAGAGCAA      |
| ATG9-R           | ATCCCCGCTAGTTGGAGAT       |
| YPT1-F           | CTGGCGGAGTGATGAAGTT       |
| YPT1-R           | ATTTGTAGAGTCCAAGGCTGAT    |
| YKT6-F           | GGTATTGCCTGCGTTTTGA       |
| YKT6-R           | CCTGAGATGGGTCCTGGTAG      |
| SEC62-F          | TCAGAGCATTATTGAGCGACA     |
| SEC62-R          | GGAAGAATCATCCCAGCCT       |
| SEC2-F           | AGATTTTCTGGGCAAGGATAG     |
| SEC2-R           | CATTTGTCTTGTTACAGGTCC     |
| ATG11-F          | TAGCCTCCTCCACCAATCA       |
| ATG11-R          | ACCATCGTAAAACCTCCTGTC     |
| COG4-F           | AACGAGTCAAGGAACAAATACC    |
| COG4-R           | GTACCGTGGCTCATAATGCT      |
| SEC4-F           | TCAACCCTTCCTTCATCACTAC    |
| SEC4-R           | TGGACTCCTCGTCATCACATT     |
| SRP9-F           | CCTCAAAGCAAGCACAACG       |
| SRP9-R           | GTGGCTCCCCTATGAAATG       |
| Actin-F          | CCAATGAACCCAAAGTCCAA      |
| Actin-R          | CCGTCACCAGAGTCCAAAAC      |
| ATG30-F          | ATGAAGACAGCAACGGAAGC      |
| ATG30-R          | TGAAAGGGTCAGGATTGAACTA    |
| ATG32-F          | CAAATATGGAGCTGGATTTCTGTGG |

|                       |                                                              |
|-----------------------|--------------------------------------------------------------|
| ATG32-R               | CTTTTCACGAGACTGGCTCATTGT                                     |
| ATG17-F               | AGACGAGATTAAGGAAAGACACG                                      |
| ATG17-R               | CAAGAAACTGAGCAAAGCACC                                        |
| ATG13-F               | AAGAGGGGAACTGGAAAATAGG                                       |
| ATG13-R               | GCTCAAATGGGAATAATAGCACTG                                     |
| ATG2-F                | TGAAACTCCTTTGGATGCTC                                         |
| ATG2-R                | TCCGAATACACTTTTGGTCTG                                        |
| PEX3-F                | CTCGGCAAACCTCATTTATCTTC                                      |
| PEX3-R                | GGCTGCTCAACAAGGGATG                                          |
| yEGFP3-F              | GTC <u>GAAATTC</u> ATGTCGAAGGGAGAA                           |
| yEGFP3-R              | GCCTCGAGTTTGTAGAGTTCATCCATACCG                               |
| ATG8-F                | TG <u>CTCGAG</u> CGATCGCAATTTAAAGACG                         |
| ATG8-R                | GT <u>GTCGACTT</u> CAATCTCCTCAACACCTG                        |
| BFP-SKL-F2            | GAG <u>AATTC</u> ATGCATCATCACCACCACCACAT                     |
| BFP-SKL-R2            | CCGTCGACTTACAACCTAGAGTTCAACTTATGACC                          |
| Tom20-fwd             | TTTTGGTCATGCATGAGATCTTTTTTGTGGGTACGGAAAGAAAT                 |
| Tom20-rev             | CCTTCGACATCTCGACATCATCGCCGTGA                                |
| yEGFP3-<br>tom20-fwd  | TGATGTCGAGATGTCGAAGGGAGAAGAGCT                               |
| pACT1-fwd             | TTTTGGTCATGCATGAGATCTTCGCTGGTAATCCCGGCTTTT                   |
| pACT1-rev             | GGTATCTGTCAATTGTATTGATGAATTTCTTTTACTAACTGTTTC                |
| Ape1-fwd              | ATTCATCAATACAATGACAGATACCAAGGAGTTAGC                         |
| Ape1-rev              | CTCCCTTCGACATAAACTCTTCAATGCCGTCG                             |
| yEGFP3-ape1-<br>fwd   | ATTGAAGAGTTTATGTCGAAGGGAGAAGAGCT                             |
| yEGFP3-rev            | ATGATGATGATGATGGTCGACTTTGTAGAGTTCATCCATACCG                  |
| 1-ATG30-<br>sgRNA-fw1 | TGAAGACGCCATGTAGTAAGTATGAGTCCGTGAGGACGAAACGAGTAAGC           |
| 2-ATG30-<br>sgRNA-fw1 | TCGTCTTAC                                                    |
| 1-ATG32-<br>sgRNA-fw1 | AAACGAGTAAGCTCGTCTTACTATTACAATTACAACGGTTTTAGAGCTAGAAA        |
| 2-ATG32-<br>sgRNA-fw1 | TAGCAAG                                                      |
| A-sgRNA-<br>struc-rev | TGAAGACGCCATGCTTCGTCTGATGAGTCCGTGAGGACGAAACGAGTAAGC          |
| B-sgRNA-<br>struc-rev | TCGTCACGA                                                    |
| C-sgRNA-<br>struc-rev | AAACGAGTAAGCTCGTCA <u>CGAAGACGATATAGAAGAGG</u> TTTTAGAGCTAGA |
| D-sgRNA-<br>struc-fw  | AATAGCAAG                                                    |
| ATG30-R               | CGCCATGCCGAAGCATGTTGCCCAGCCGGCGCCAGCGAGGAGGCTGGGACC          |
| gap-ATG30-F           | ATGCCGGCC                                                    |
|                       | AGAAGACGCAAGCAGTCCAAAGCTGTCCCATTCGCCATGCCGAAGCATGTT          |
|                       | GCCCAGCCG                                                    |
|                       | AGGCTGGGACCATGCCGGCCAAAAGCACCGACTCGGTGCCACTTTTTCAAG          |
|                       | TTGATAACG                                                    |
|                       | GTTTTAGAGCTAGAAATAGCAAGTTAAAATAAGGCTAGTCCGTTATCAACTTG        |
|                       | AAAAAGT                                                      |
|                       | CCTTCGACATTAAAATCTCCTGTTTGAGCTTTG                            |
|                       | CCGAATTCATGTTTTCCAGAAAGCAAGTAC                               |

ATG32-EcoRI-  
F GCCGAATTCATGAAGCAAACGTATTACGAT

ATG32-  
yEGFP3-R CCTTCGACATCTATACAGTGCAGCGCATCC

---
